# Supplementary material
Source: publisher figshare collection journal article supplement (https://gsajournals.figshare.com/ndownloader/files/21866184)
Supplement: Supplementary file 1 [file 21866184]

**SUPPLEMENTAL TABLES**

**Table S1.** **Primers used in this study**

| **Primer ID** | **Forward primer (5’-3’)** | | **Reverse primer (5’-3’)** | **R.E.1/Position/Probe** |
| --- | --- | --- | --- | --- |
| **High resolution mapping (CAPS2 markers)** | | | | |
| SNP2788 | AGTGGAACCCTTCTGAAATCAA | | ATTGCAATTTGACTGGTTGACA | *ApeK*I |
| SNP2830.7 | TCGTGCGTGTAGAGGATAAGAA | | AAGCAAACCAAACACAATCCTT | *HypCH*4IV |
| SNP2830.9 | TTCTTTTTCTTGCTCTGTTCTCC | | AAGAAACCAAGGGGGTCAAA | *Mnl*I |
| SNP2835 | GTCAAGGATACGATCATATCTTTCT | | TCTAAAGTGGGTTCGTGGCTTA | *Hpy*188I |
| SNP2855 | AGGTGGACAATTCATCCAGAAG | | AACGGCCCATAATCTCACATAG | *Taq*I |
| **High resolution mapping (Indel3 markers)** | | | | |
| Indel2823 | TATGCAAGCTAAGCCTGTGTTT | | AGCCCTATATATGCACAACATTCA |  |
| Indel2829 | ATTTGATCAACCCCTGCACTT | | CCGACTCCTACTCTCCATTCAG |  |
| **DNA sequencing** | | | | |
| Seq_SBN1 | ATTTGATCAACCCCTGCACTT | | CCGACTCCTACTCTCCATTCAG | 1730 ~ 919-bp of *FZP* |
| Seq_SBN2 | TATATGCATGATCGCTCAGAGG | | GGAGGTACGCTGCCGAGATA | 1020 ~ 200-bp of *FZP* |
| Seq_SBN3 | GTGGGTGTAGACGAAGTTGGTG | | AGCTAGCATGCATTGTCATCAT | 340 ~ -456-bp of *FZP* |
| Seq_SBN4 | GAGGGGAATGTTGTGTGCTACT | | TGCCCTTCTACACATTTCACAC | -355 ~ -1150-bp of *FZP* |
| Seq_SBN5 | CACTTAAGAAGCTTTCAAATGGAG | | TTGATACTTCATCCGTTTCAGG | -1071 ~ -1919-bp of *FZP* |
| Seq_SBN6 | AGCATCTTGTAAAAGGCTTCAAA | | GGGTGTGACCCTAAGGAATAGA | -1809 ~ -2588-bp of *FZP* |
| **Primer ID** | **Forward primer (5’-3’)** | | **Reverse primer (5’-3’)** | **R.E.1/Position/Probe** |
| **DNA sequencing** |  | | | |
| Seq_SBN7 | ACAATGGCCTTGACAAGATGTA | | GCACTCTCCTCTTGGTACTTGG | -2466 ~ -3261-bp of *FZP* |
| Seq_SBN8 | GGTCAAACAGTTCGATCTCACA | | ATGTCCCCTGAAAATCACTCAT | -3181 ~ -4004-bp of *FZP* |
| Seq_SBN9 | GAAGAATGGAGATATGATGTGTGG | | CTCTGTTCCATCTACCGCATC | -3906 ~ -4730-bp of *FZP* |
| Seq_SBN10 | ACTGTAGTGTGGTGACCTCGAT | | CGTAGTTGAGTACAAAGCGAGA | -4667 ~ -5495-bp of *FZP* |
| Seq_SBN11 | CGGGCTATGTATGCACCAC | | AGCTGAGCTAGCTATACCCATCA | -5414 ~ -6245-bp of *FZP* |
| Seq_SBN12 | AAGCAGCTCGAGTCACTACTCA | | AAACACAAAAATAGAGCTTGACCA | -6150 ~ -6934-bp of *FZP* |
| Seq_SBN13 | TCAAAAATCGTCACTCATTTGG | | GAGAGAGGCAAGACCTCAAGAC | -6801 ~ -7624-bp of *FZP* |
| Seq_SBN14 | AGCACCCATAATTCAGTTTTGC | | GGGGTCAAAAGAAAAAGGAAGA | -7547 ~ -8353-bp of *FZP* |
| **Genotyping of four grain number genes (CAPS2 markers)** | | |  |  |
| IPA1 | TCAGAAGCTTTACGTTGGATTTC | | TGAGACTTCATGTGGTAGCTGGT | *BsiHKA I* |
| SPIKE | GGAGTACTTCTGAAGCGTTCGT | | AGCCCTGACCAGCTAATTTGTA | *HpyCH*4III |
| **Genotyping of four grain number genes (Indel3 markers)** | | |  |  |
| GN1A | CTGCTTATTTATAGGCCACCTTG | | GAAGCAGTTGAGCATGAGGAG |  |
| DEP1 | GACTGCTGCTCATGCTGTAAAC | | CAACATAAGCAACCACTGAGACA |  |
| **Vector construction** | |  |  |  |
| Vector_p40 | CAGGTCGACTCTAGAGGATCCTTGAGGGAGTACGTATTTAACGA | | GAGCTCGGTACCCGGGGATCCTACATCTTGTCAAGGCCATTGTG |  |
| Vector_p66 | AATTCCCATTGAATTCTTGCCGATA | | CCATGATTACGAATTCACAGTGAACAATACAAAACCTGTGA |  |
| **Primer ID** | **Forward primer (5’-3’)** | | **Reverse primer (5’-3’)** | **R.E.1/Position/Probe** |
| **Vector construction** |  | |  |  |
| Vector_RNAi | TGACCATGGTAGATCTCAGCAGCAGCCACAGCA | | ACCTGTAATTCACACGTGGCTGCTGATGCTGATG |  |
| **Real-time PCR** |  | |  |  |
| QPCR_Os07g47340 | TCGCGCCGCTTCCA | | TTGCTAAAGCAGCAGCCTTGT | FAM-CAGCCCAGGATGGCT-NFQ |
| QPCR_FZP | GTCGCTGCTGGACATGGA | | CGGCGCCGGAGAAGA | FAM-ACGGCCACGACTTCC-NFQ |
| QPCR_UBQ5 | CCGCCTCCGCAAGGA | | AAGTGGTTGGCCATGAAGGT | FAM-CCAACGCCGAGTGCG-NFQ |
| **Development of NILs (CAPS2 markers)** | | | | |
| SNP2830.5 | TATGCCATGAGTGATTTTCAGG | | GCTAGATCAACGGTCACGATTT | *Hpy*188I |
| **Development of NILs (KASP4 markers)** | | | | |
| TN13_C2_8 | GAGGCTTCTTGCCACGTGATG  CTGAGGCTTCTTGCCACGTGATA | | CACTACTATTTCAGCCAGCAAAGAAGATA |  |
| TN13_C3_6 | TTCTCGGAGACCACGGTAGAA  TCTCGGAGACCACGGTAGAG | | CAACCCTCAAAAAAGTAGGGCAAAACTAA |  |
| TN13_C6_5 | GTTTTATTGCATTCAAATGCATACTGTCA  GTTTTATTGCATTCAAATGCATACTGTCG | | AGGCATGAGGAAGCACAGGGAATAT |  |
| TN13_C7_22 | CCCAAGTTACCCATCGTGAAGC  TCCCAAGTTACCCATCGTGAAGT | | AGCGGCGGCCTTTGATCGGTA |  |
| TN13_C8_20 | AACATCCACAACAGCTGGTTTGTCT  AACATCCACAACAGCTGGTTTGTCA | | GGTTGATGGCGATGATGGAAAGGAA |  |
| TN13_C9_16 | GTGTATCTGCATTTCATGTCTTTGCTA  GTATCTGCATTTCATGTCTTTGCTG | | TTTGCACTTGGGTGAGCACTTGCAA |  |

| **Primer ID** | **Forward primer (5’-3’)** | **Reverse primer (5’-3’)** | **R.E.1/Position/Probe** |
| --- | --- | --- | --- |
| **Development of NILs (KASP4 markers)** | |  |  |
| TN13_C11_21 | AATTGAATTACTCTTGTTGTTGAGTTGCTA  GAATTACTCTTGTTGTTGAGTTGCTG | TCAAGAAAGCAGACCAGATTGAAACACTT |  |
| TCS10_C2_15 | TTCTAGCCTTAATATGGACCATT  GCTTTCTAGCCTTAATATGGACCATC | GGCCATAATATGATTGAGGTGTCAAACTA |  |
| TCS10_C2_25 | GTAAATTTCTTCGGATTTAGGAATACTAGT  GTAAATTTCTTCGGATTTAGGAATACTAGA | AGCGGCCTGTGATACGTGGCTA |  |
| TCS10_C4_14 | ATTCGCATCATTCTCACTTCCCGTA  CGCATCATTCTCACTTCCCGTG | GAGGTGTAGACAAGATTGGTGGTGAT |  |
| TCS10_C7_20 | GTACCTGATCTCGTTGTCTGTTTCT  ACCTGATCTCGTTGTCTGTTTCC | AATTAACTAACCATCGTGGGCTACTACTT |  |
| SNP2831 | CGGCATGATCTACTATGTCTAAATCG  CGGCATGATCTACTATGTCTAAATCT | GGTAGTACGGCAAGCATGATCAGAA |  |
| **Transgenic plant identification** | | | |
| hptII | CAAGCTGCATCATCGAAATTG | AGGTCGCCAACATCTTCTTCT |  |

1 R.E.,Restriction Enzyme

2 CAPS, Cleaved Amplified Polymorphic Sequences.

3 Indel, Insertion/deletion.

4 KASP, Kompetitive Allele Specific PCR.
